# Supplementary material
Source: publisher figshare collection journal article supplement (https://acs.figshare.com/ndownloader/files/5128561)
Supplement: Supplementary file 1 [file 5128561]

## SUPPORTING INFORMATION

### Gram-scale Synthesis and Bio-functionalization of Silica-coated Silver Nanoparticles for Fast Colorimetric DNA Detection

Shuhua Liu,<sup>†</sup> Zhihua Zhang,<sup>†</sup> and Mingyong Han<sup>\*,†,‡</sup>

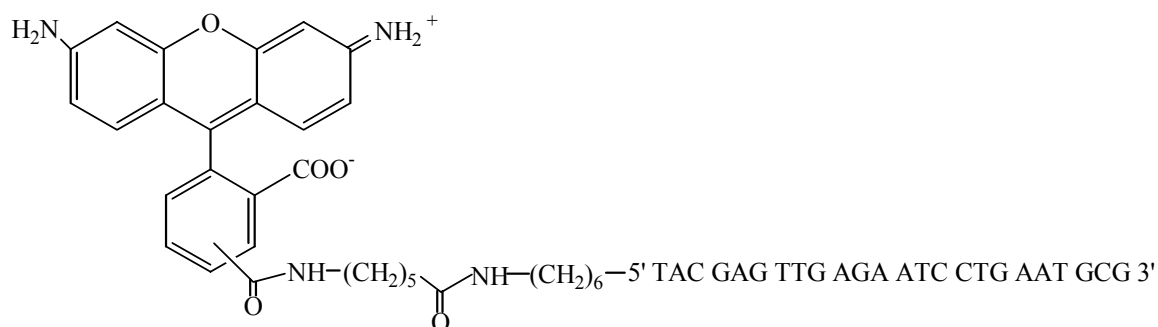

**Figure 1s.** Molecular structure of fluorescent complementary oligo target 5' Rhodamine G-CONH-(CH<sub>2</sub>)<sub>5</sub>-CONH-(CH<sub>2</sub>)<sub>6</sub>-TAC-GAG-TTG-AGA-ATC-CTG-AAT-GCG 3'.

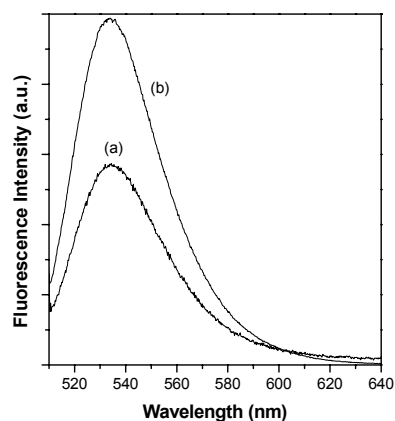

**Figure 2s.** (a) Fluorescence spectrum of 5' Rhodamine G-CONH-(CH<sub>2</sub>)<sub>5</sub>-CONH-(CH<sub>2</sub>)<sub>6</sub>-TAC-GAG-TTG-AGA-ATC-CTG-AAT-GCG 3' displaced by a dehybridization process for determining hybridization efficiency as compared to that of (b) a standard sample containing 0.2 nmol fluorescent target oligonucleotides.
